# Supplementary material
Source: Springer Nature journal article supplement (https://www.springermedizin.de/resource/supplementary/12889_2012_5049_MOESM2_ESM.pdf/9493162)
Supplement: MOESM2 [file 9493162]

### Factors integration on the basis of rotation matrix

| Factors | Variables                                                      | Factor<br>1          | Factor<br>2  | Factor<br>3  | Factor<br>4  | Factor<br>5  | Factor<br>6          | Factor<br>7  | Factor<br>8  | Factor<br>9          | Factor<br>10 | Factor<br>11 | Factor<br>12 |
|---------|----------------------------------------------------------------|----------------------|--------------|--------------|--------------|--------------|----------------------|--------------|--------------|----------------------|--------------|--------------|--------------|
| 1       | Perennial,<br>Orchard,<br>Rangeland                            | 0.74<br>0.70<br>0.60 |              |              |              |              |                      |              |              |                      |              |              |              |
| 2       | Recreation area,<br>Golf course                                |                      | 0.90<br>0.89 |              |              |              |                      |              |              |                      |              |              |              |
| 3       | Mine,<br>Deciduous forest                                      |                      |              | 0.92<br>0.87 |              |              |                      |              |              |                      |              |              |              |
| 4       | Reservoir,<br>Pasture/farm house                               |                      |              |              | 0.86<br>0.85 |              |                      |              |              |                      |              |              |              |
| 5       | City,<br>Aquaculture land                                      |                      |              |              |              | 0.84<br>0.79 |                      |              |              |                      |              |              |              |
| 6       | Institutional land,<br>Build-up village,<br>Natural water body |                      |              |              |              |              | 0.63<br>0.62<br>0.56 |              |              |                      |              |              |              |
| 7       | Field crop,<br>Pit                                             |                      |              |              |              |              |                      | 0.70<br>0.70 |              |                      |              |              |              |
| 8       | Marsh/swap/rice<br>paddy,<br>Gasoline<br>station/workshop      |                      |              |              |              |              |                      |              | 0.86<br>0.79 |                      |              |              |              |
| 9       | Transportation/comm<br>unication,<br>Horticulture, Landfill    |                      |              |              |              |              |                      |              |              | 0.78<br>0.68<br>0.19 |              |              |              |
| 10      | Industrial area,<br>Forest plantation                          |                      |              |              |              |              |                      |              |              |                      | 0.81<br>0.20 |              |              |
| 11      | Perennial/orchard,<br>Cemetery                                 |                      |              |              |              |              |                      |              |              |                      |              | 0.79<br>0.65 |              |
| 12      | Marsh/swap,<br>paddy field                                     |                      |              |              |              |              |                      |              |              |                      |              |              | 0.81<br>0.32 |

All factors were grouped on the basis of loading values. Factor 1 represents (perennial, orchard and rangeland), factor 2 represents (recreation area and golf course) and so on.
